# Supplementary material for: LMOD1, an oncogene associated with Lauren classification, regulates the metastasis of gastric cancer cells through the FAK-AKT/mTOR pathway
Source: PubMed Central journal article supplement (PMC9055720; doi:10.1186/s12885-022-09541-0), 2022-04-30

The nucleotide sequence for the LMOD1 overexpression plasmid :

ATGTCTAGAGTAGCCAAATATCGCCGGCAGGTGAGTGAAGACCCCGACATCGACAGCCTGCTG  
GAGACCCTGTCTCCCGAGGAGATGGAGGAGCTGGAGAAGGAGCTGGACGTGGTGGACCCAGA  
CGGGAGTGTTCCCGTGGGGCTGCGGCAGAGAAACCAGACGGAGAAACAGTCCACGGGTGTGT  
ACAACCGGGAGGCCATGCTCAACTTCTGTGAAAAGGAGACCAAGAACTTATGCAGAGGGAGA  
TGTCCATGGATGAAAGCAAGCAAGTGGAGACCAAGACAGATGCCAAGAATGGAGAGGAAAGG  
GGCAGAGATGCCAGCAAAAAAGCCCTGGGCCCCAGACGGGACTCAGATCTGGGGAAGGAGCC  
AAAGAGGGGTGGTTTAAAGAAAAGCTTCTCTAGAGACAGAGATGAAGCTGGTGGCAAGAGTGG  
CGAGAAGCCCAAGGAGGAGAAGATCATCCGGGGCATTGACAAGGGCCGGGTGAGGGCTGCAG  
TGGATAAGAAGGAGGCAGGGAAGGATGGGAGAGGAGAGGAGAGGGCAGTGGCCACCAAGAA  
GGAAGAGGAGAAGAAAGGGAGTGACAGGAACACAGGCTTGAGCAGGGACAAGGATAAAAAG  
AGAGAGGAGATGAAGGAGGTGGCCAAGAAAGAGGATGATGAGAAGGTAAAAGGGGAGCGTA  
GGAACACAGACACCAGAAAAGAGGGTGAAGAAGATGAAAAGAGCAGGTGGGAACACAGACAT  
GAAAAGGAGGATGAGAAGGTAAAAGAGGAACTGGGAACACAGACACCAAAAAGGACGAT  
GAAAAGTCAAGAAGAATGAACCCTTACATGAAAAGGAAGCCAAGGATGACAGCAAGACCAA  
AACACCCGAGAAACAGACGCCAGTGGCCCCACCAAGCCCTCTGAAGGACCGGCCAAGGTGG  
AGGAGGAGGCAGCTCCCAGCATATTTGATGAGCCTCTGGAGAGAGTGAAGAACAATGACCCCG  
AGATGACTGAGGTGAACGTCAACAACCTCAGACTGCATCACAATGAGATCTTGGTCCGGTTTAC  
TGAGGCTCTGGAGTTCAACACTGTGGTTAAGCTGTTTCGCTTGGCCAACACGCGAGCCGATGAC  
CACGTGGCCTTTGCCATTGCCATCATGCTCAAGGCCAACAAGACCATCACCCAGCCTCAACCTGG  
ACTCCAACCACATCACAGGCAAAGGCATCCTGGCCATCTTCCGGGCCCTCCTCCAGAACAACA  
CGCTGACCGAGCTCCGCTTCCACAACCAGCGACACATCTGTGGAGGCAAGACGGAGATGGAG  
ATCGCCAAGCTGCTGAAGGAGAATACTACCCTGCTCAAGCTGGGCTACCATTTTGAGCTGGCCG  
GGCCCCGAATGACTGTCACCAATCTGCTCAGCCGCAACATGGACAAGCAGAGACAAAAGCGG  
CTGCAGGAGCAAAGGCAGGCACAGGAAGCCAAGGGAGAGAAGAAGGATCTGCTGGAGGTAC  
CCAAGGCCGGGGCCGTGGCTAAGGGCTCCCCAAAACCTTACCTCAACCATCTCCAAAGCCCT  
CTCCAAAGAACTCACCCAAAAAAGGGGTGCTCCAGCTGCCCCACCACCCCTCCCCCTCCCTT  
GGCTCCACCCCTTATCATGGAGAACCTGAAGAATCACTCTCACCAGCTACCCAGAGGAAGATG  
GGAGACAAAGTCCTCCCTGCCAGGAGAAGAACTCCCGTGACCAGCTATTGGCTGCCATCCGC  
TCCAGCAACCTCAAGCAGCTCAAGAAGGTGGAAGTGCCCAAACTGCTTCAGTAG

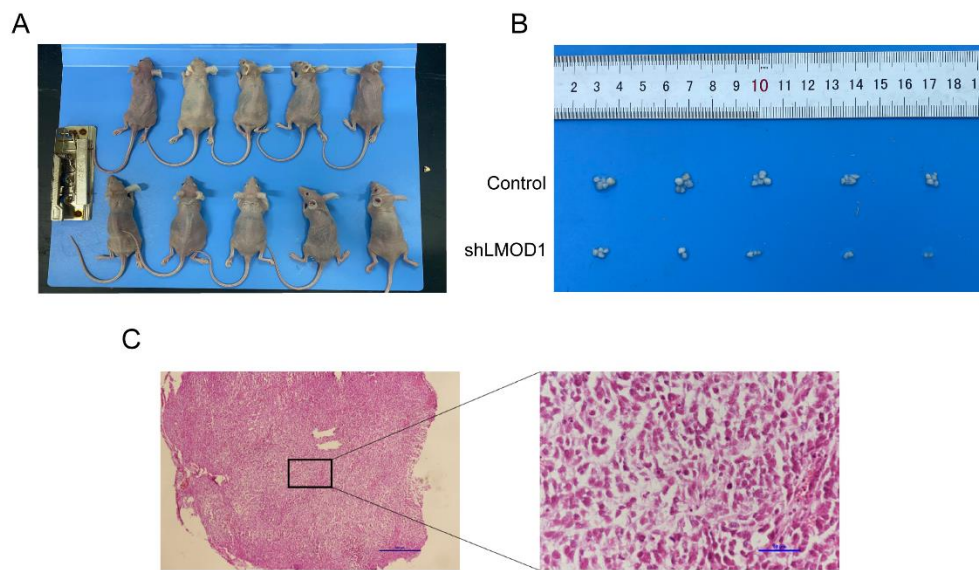

Supplement figure 1. Peritoneal metastasis model in nude mice.

A. General picture of nude mice. B. Solid tumors in abdominal cavity of nude mice. C. H&E staining of solid tumors.

Supplementary Figure\_Original Western blots  
Figure 4A

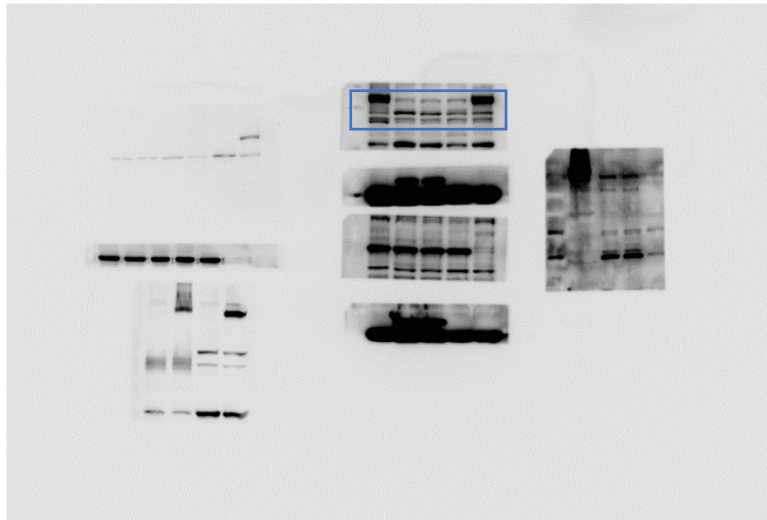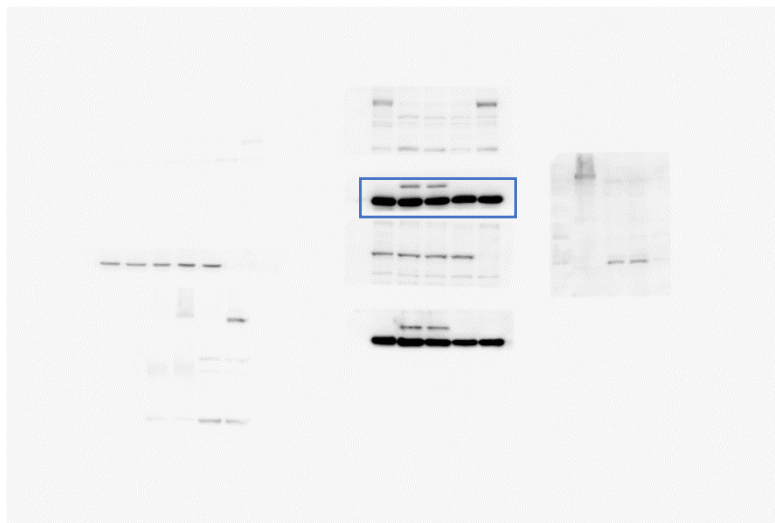

Figure 4G  
LMOD1

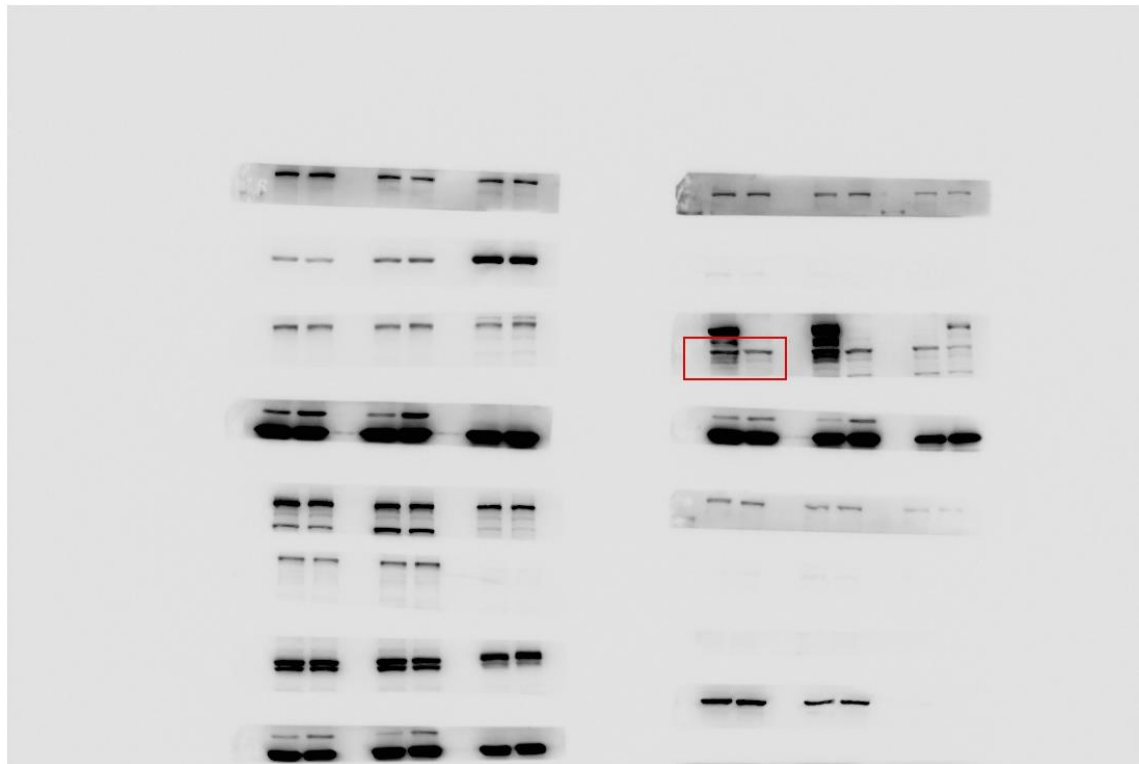

FAK

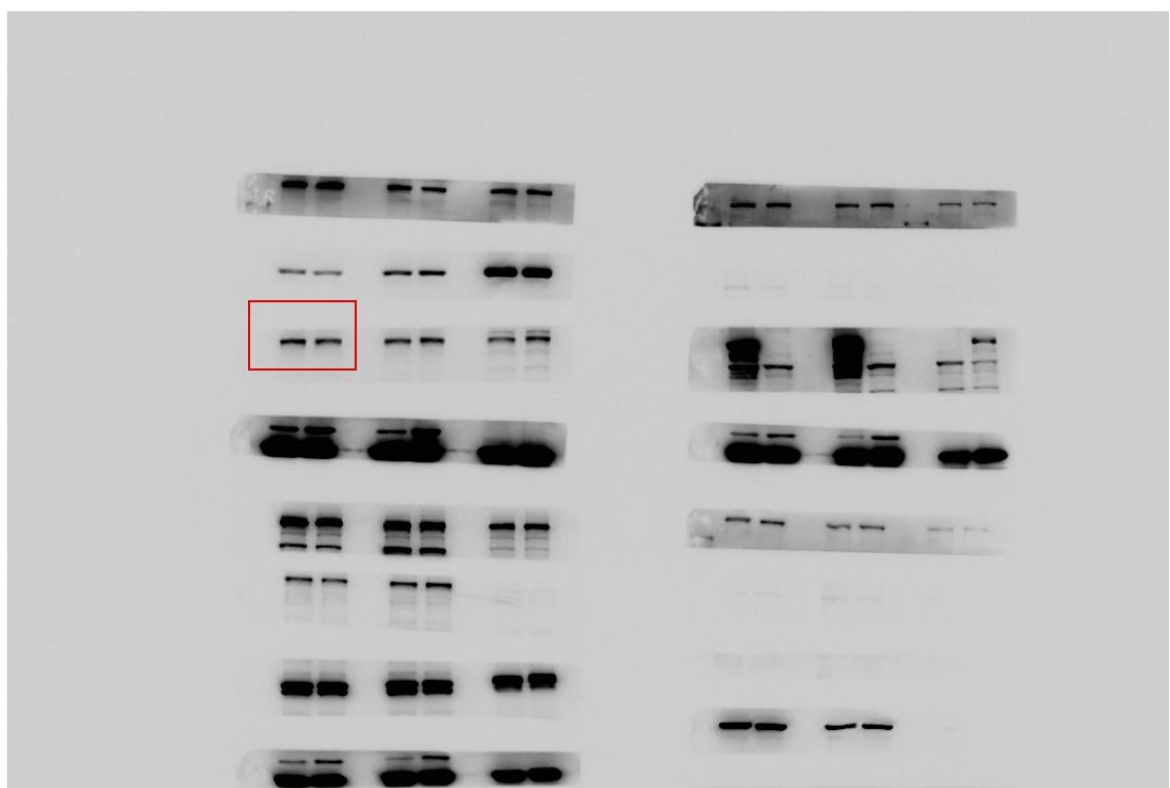

AKT

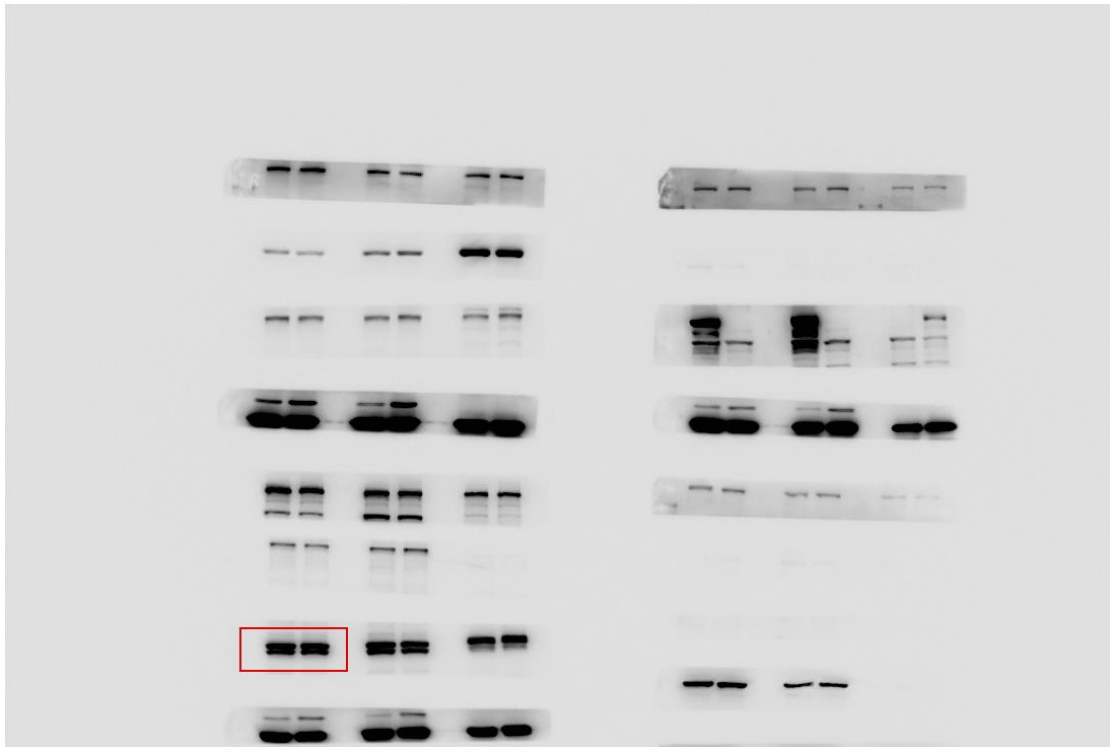

p-AKT

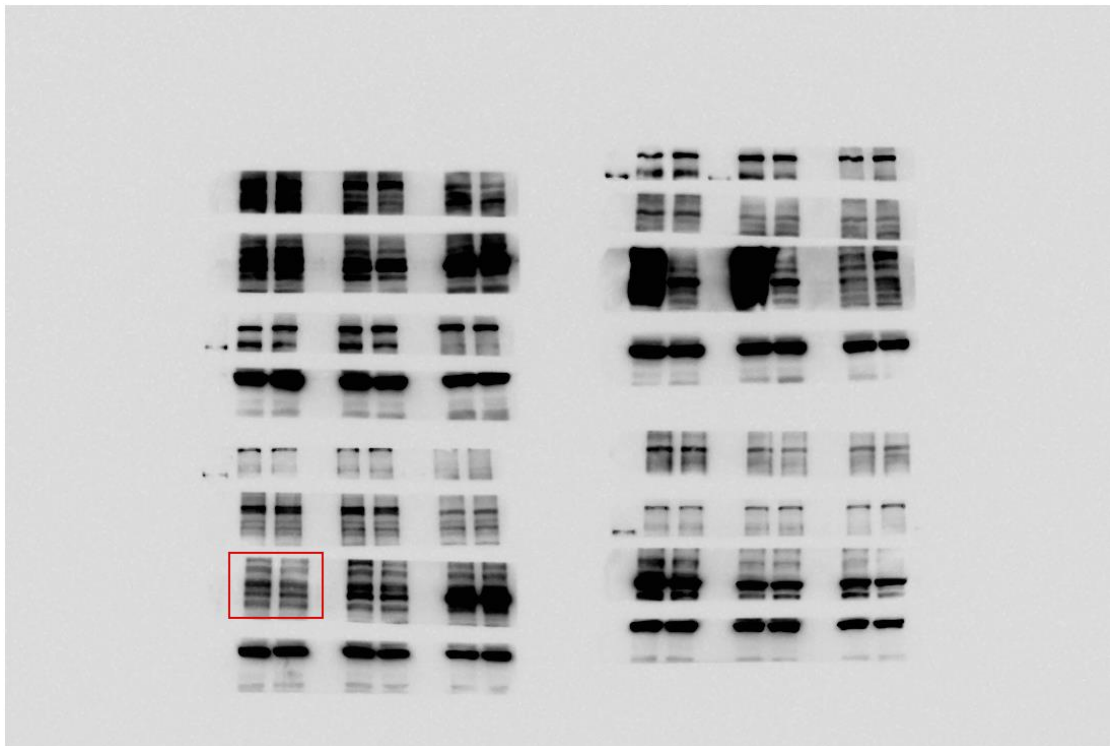

mTOR

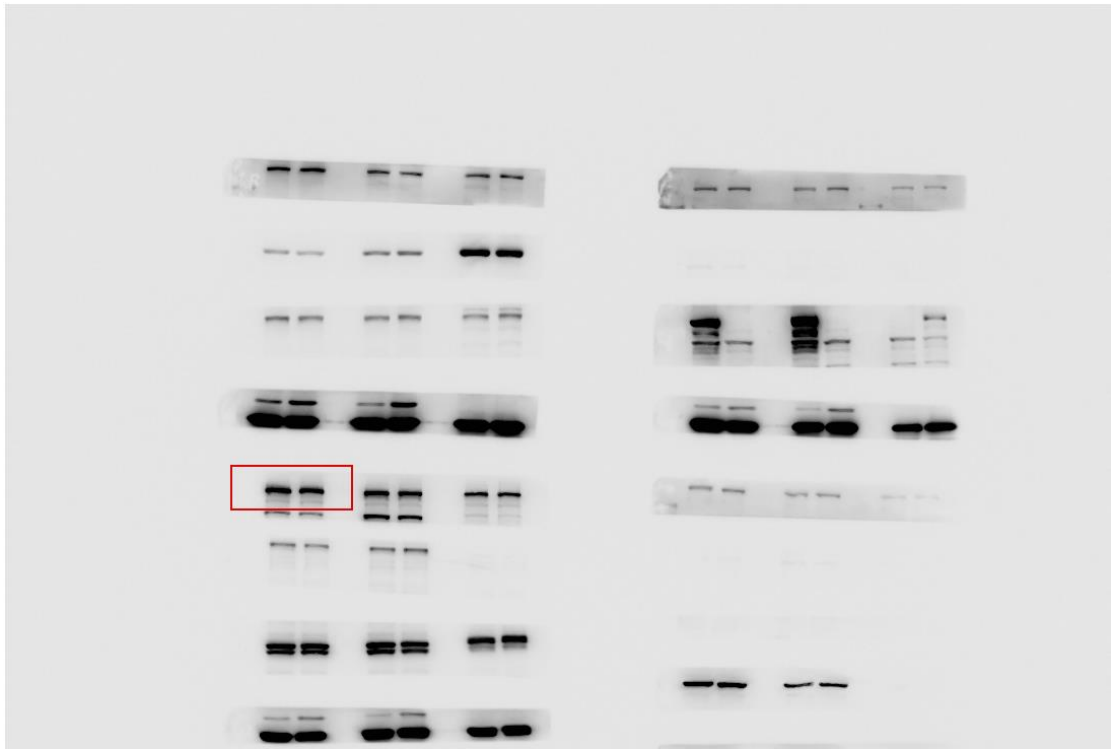

p-mTOR

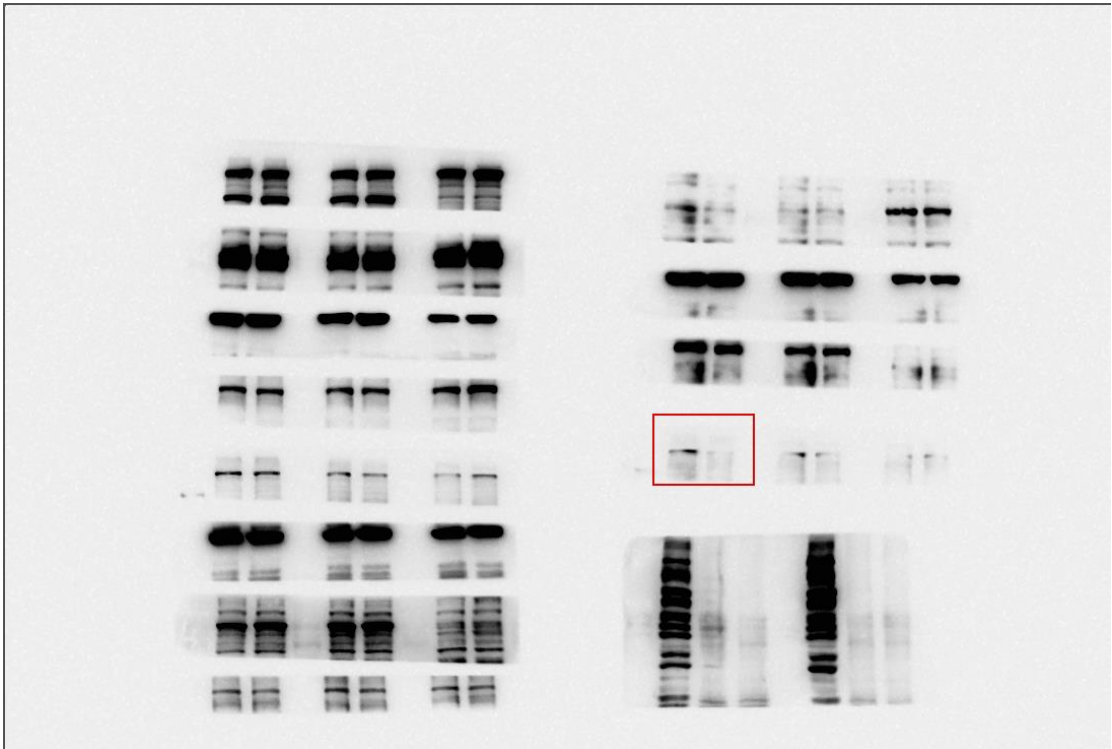

Actin

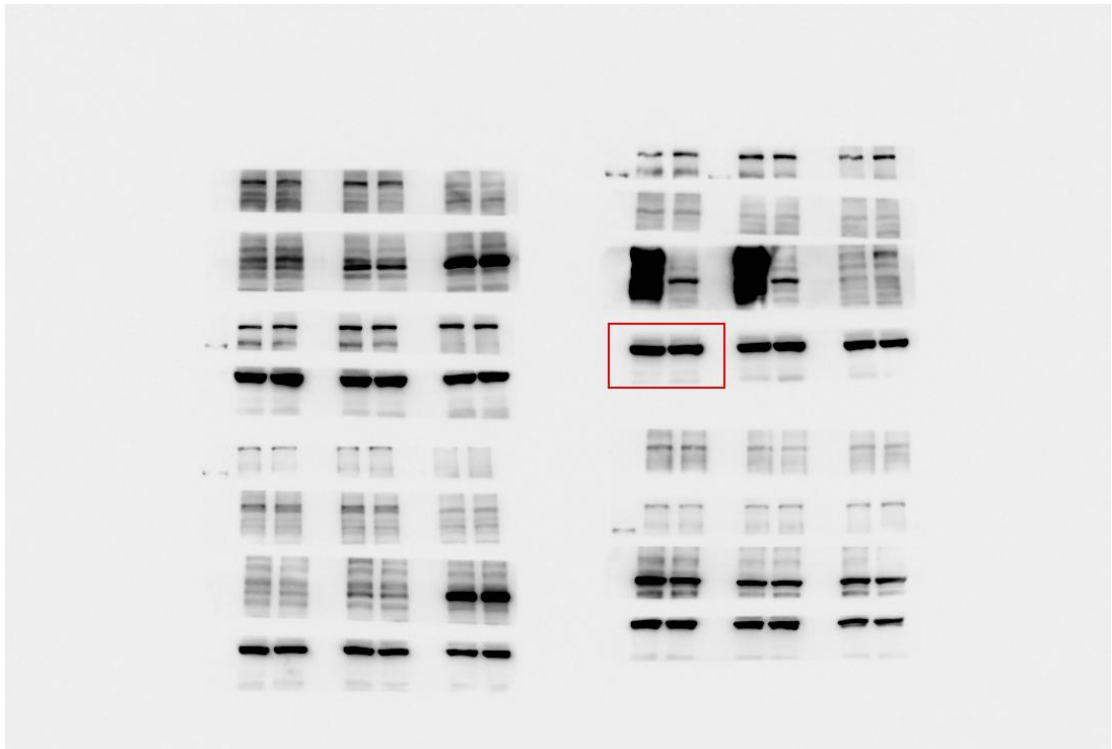

Figure 4H  
LMOD1

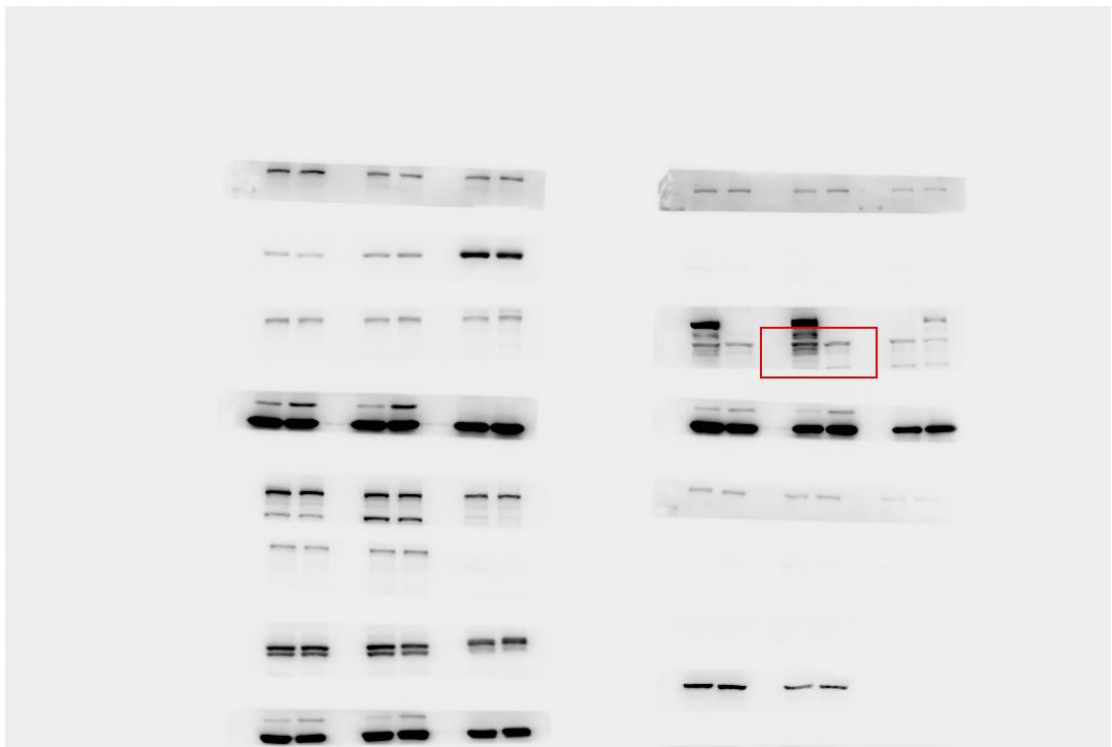

FAK

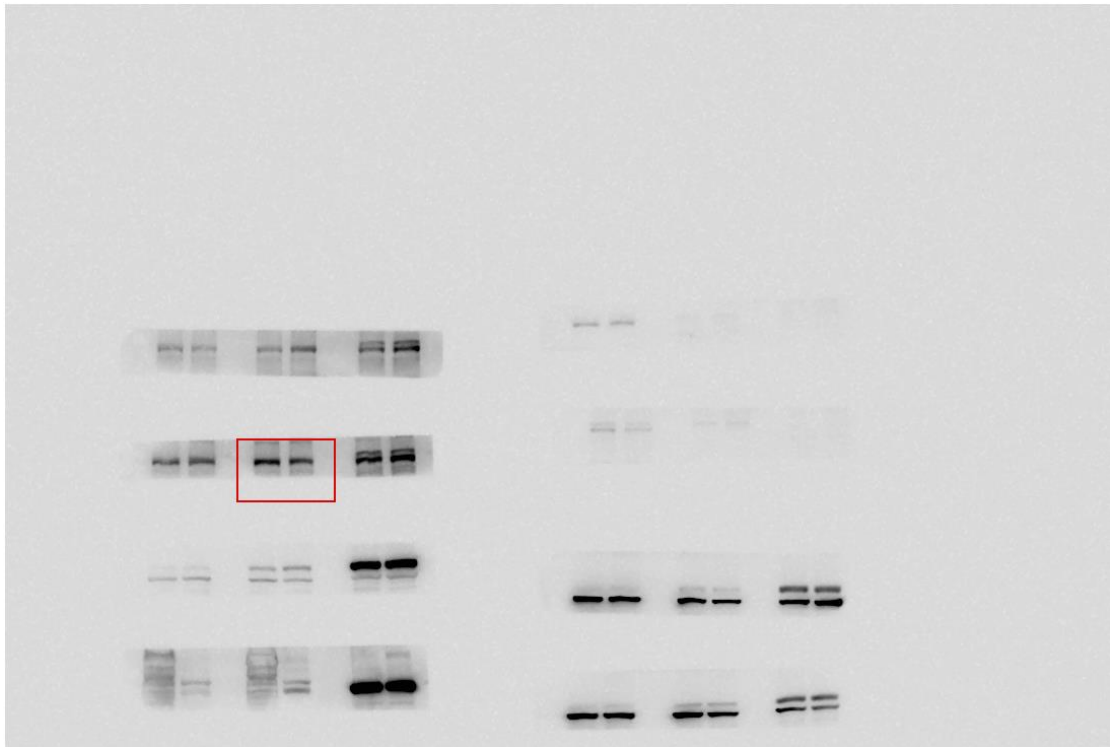

AKT

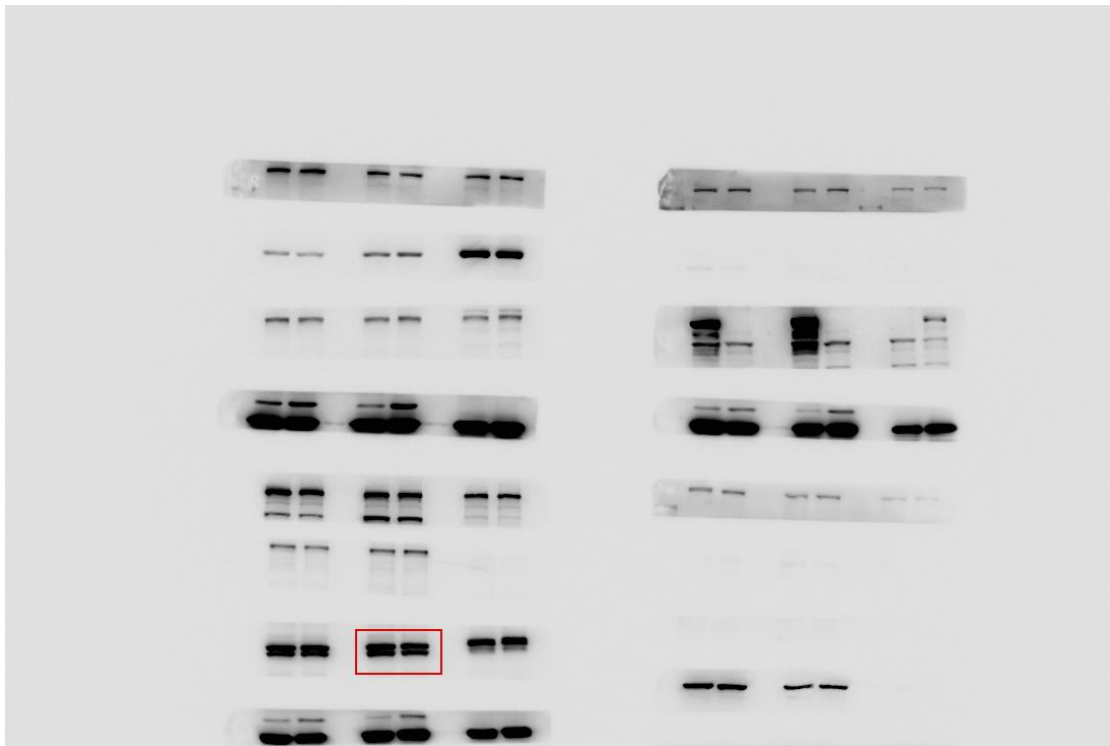



p-AKT

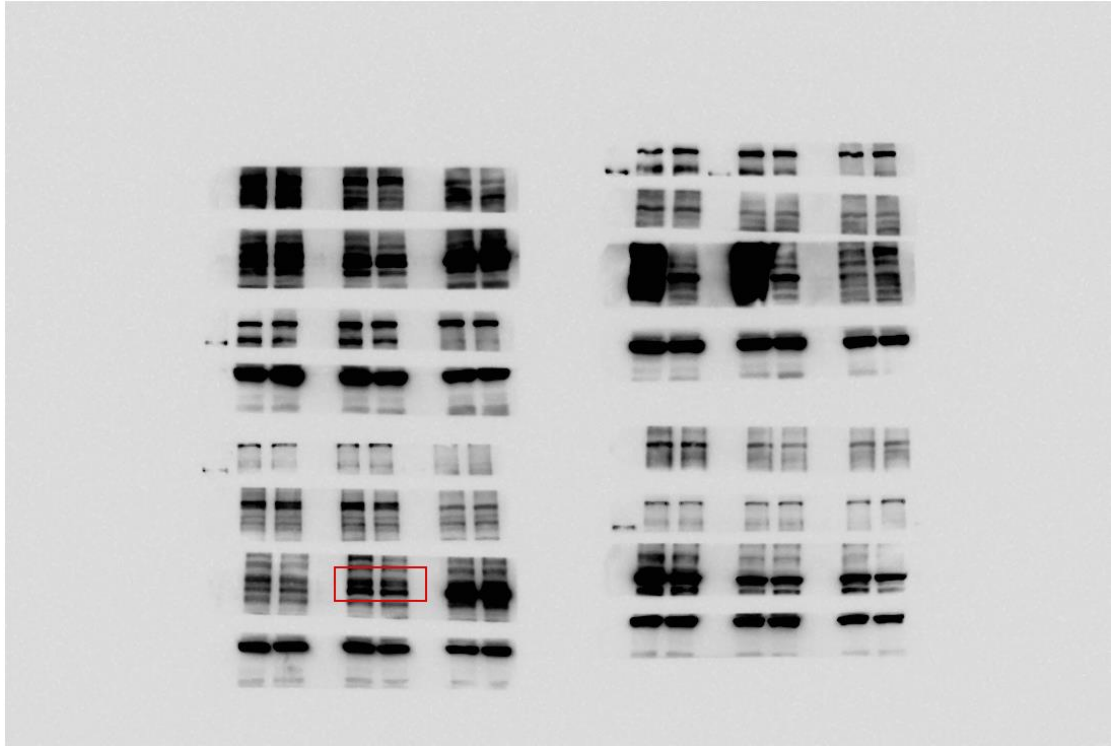

mTOR

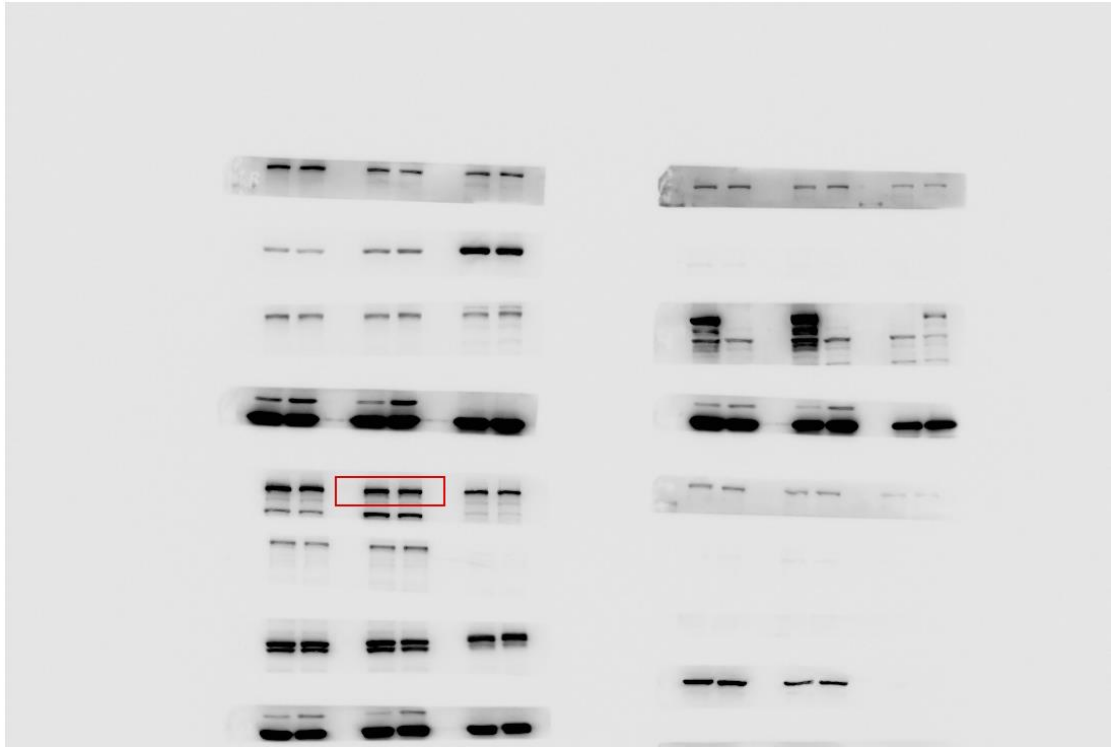

p-mTOR

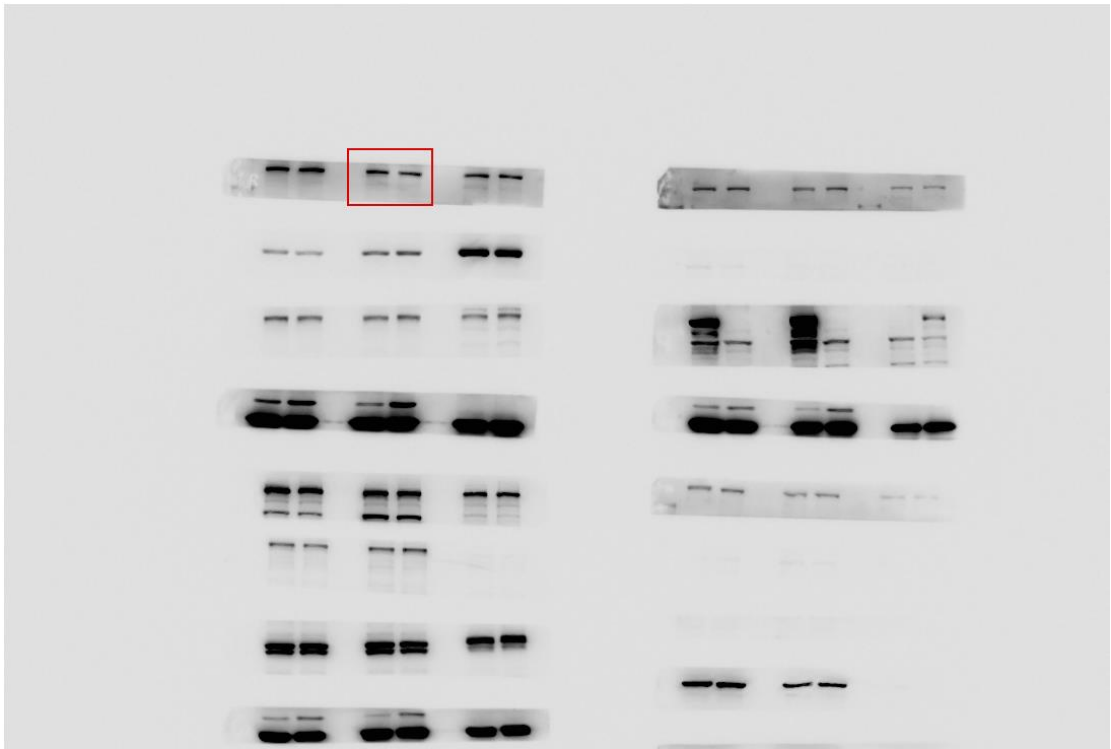

Actin

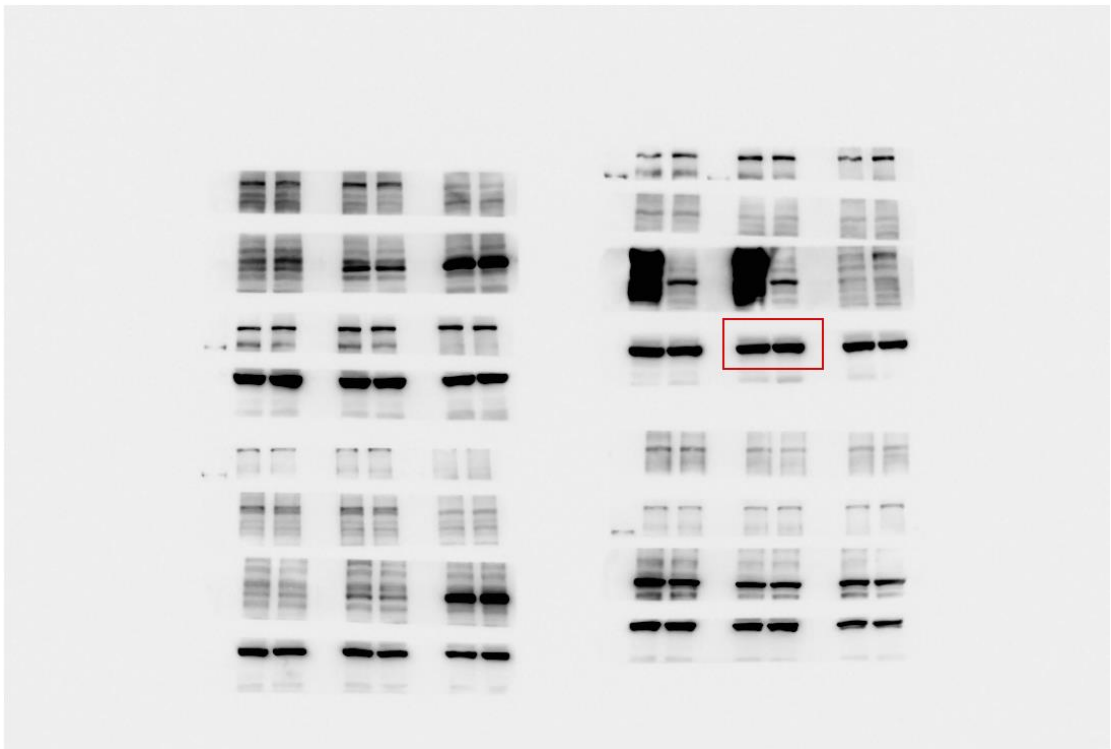

Figure 4I  
LMOD1

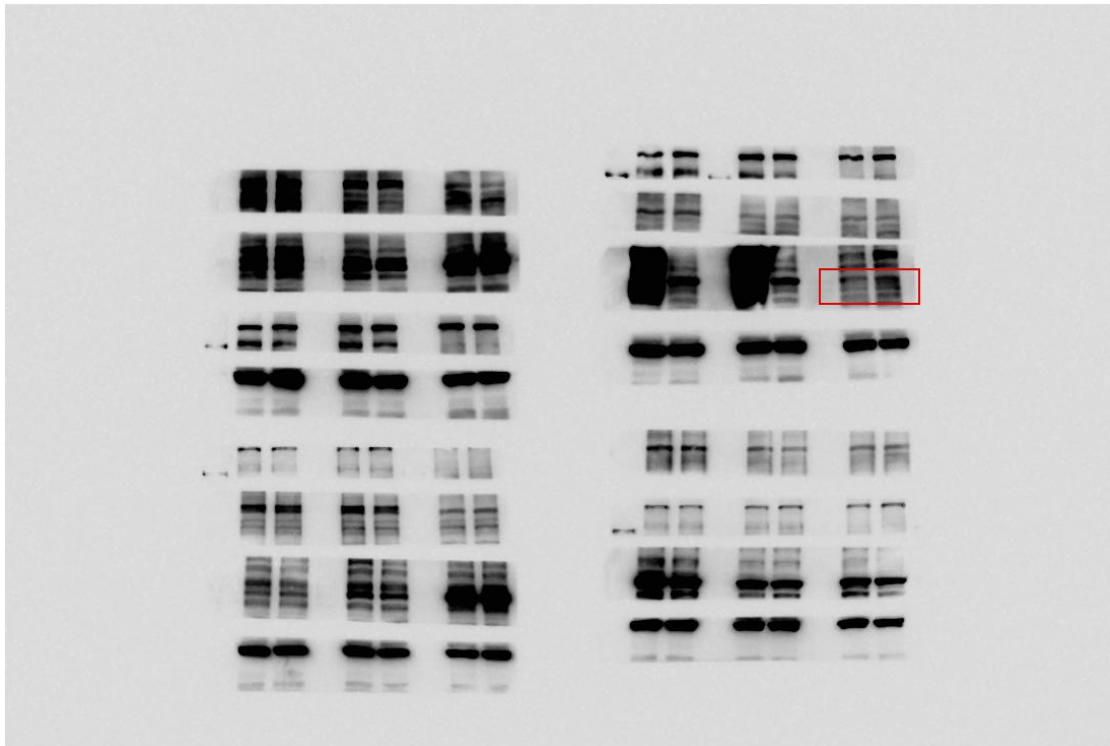

FAK

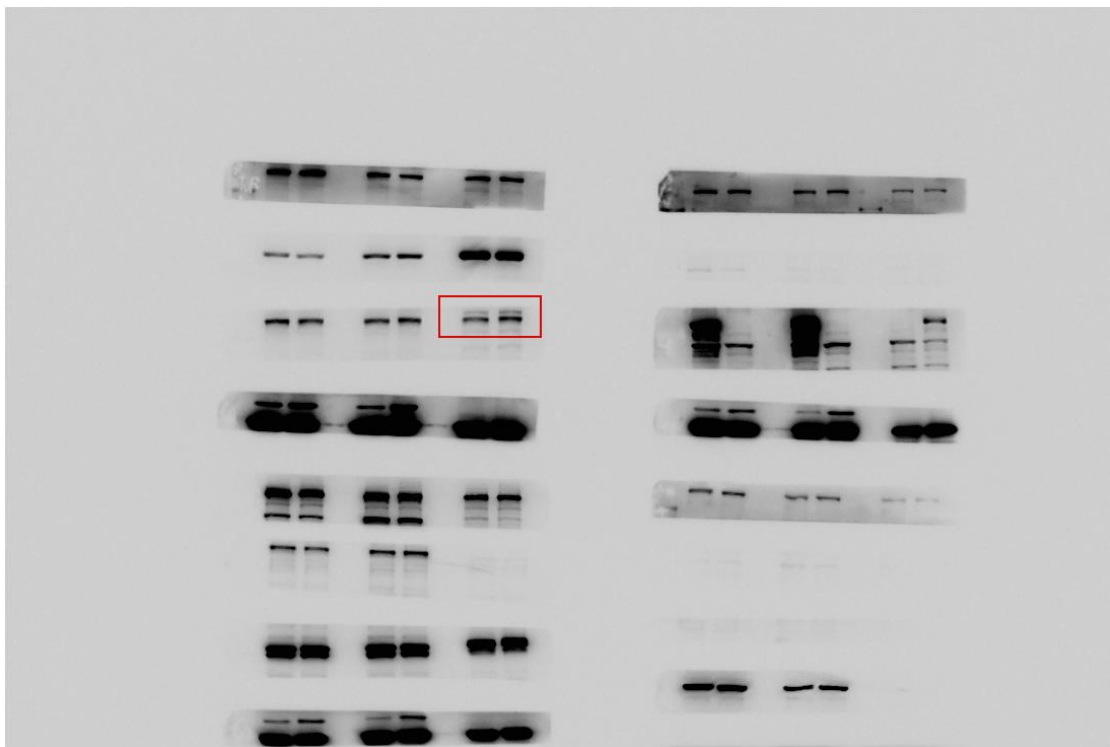

AKT

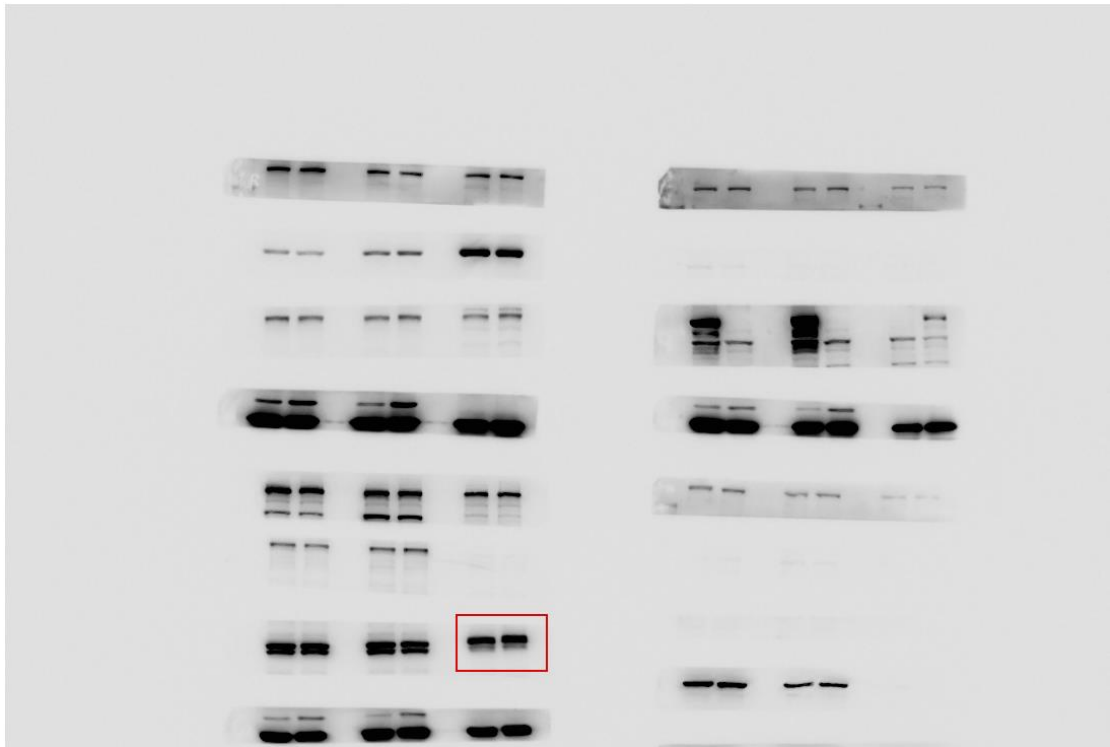

p-AKT

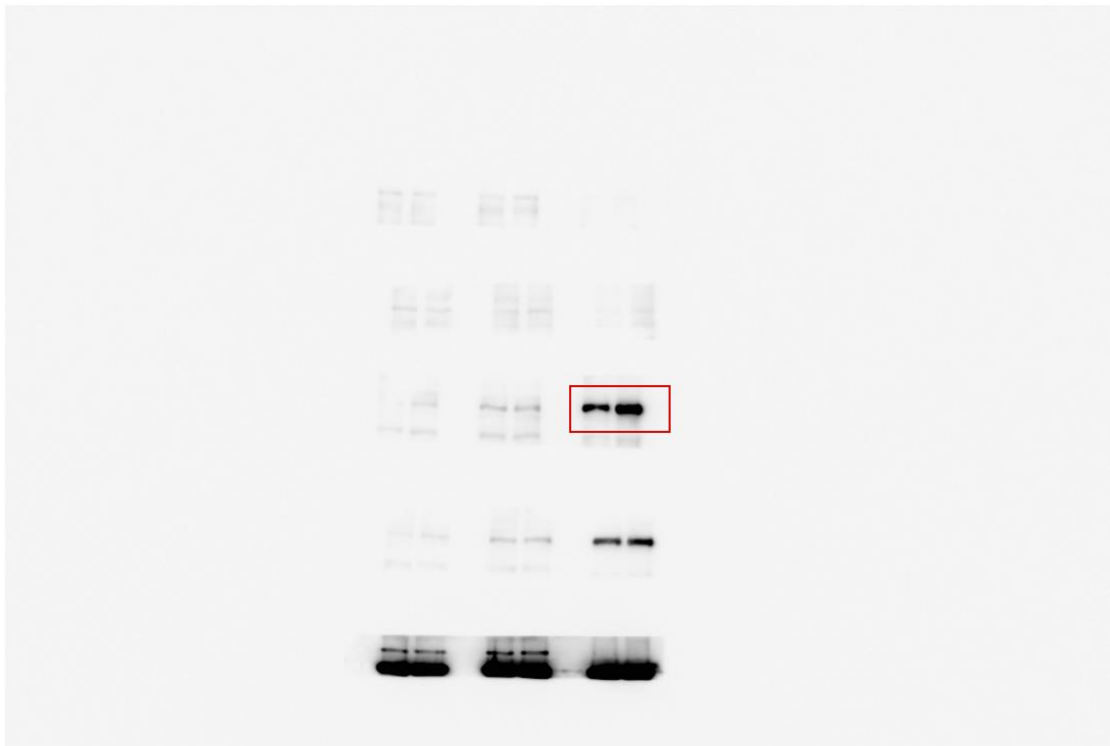

mTOR

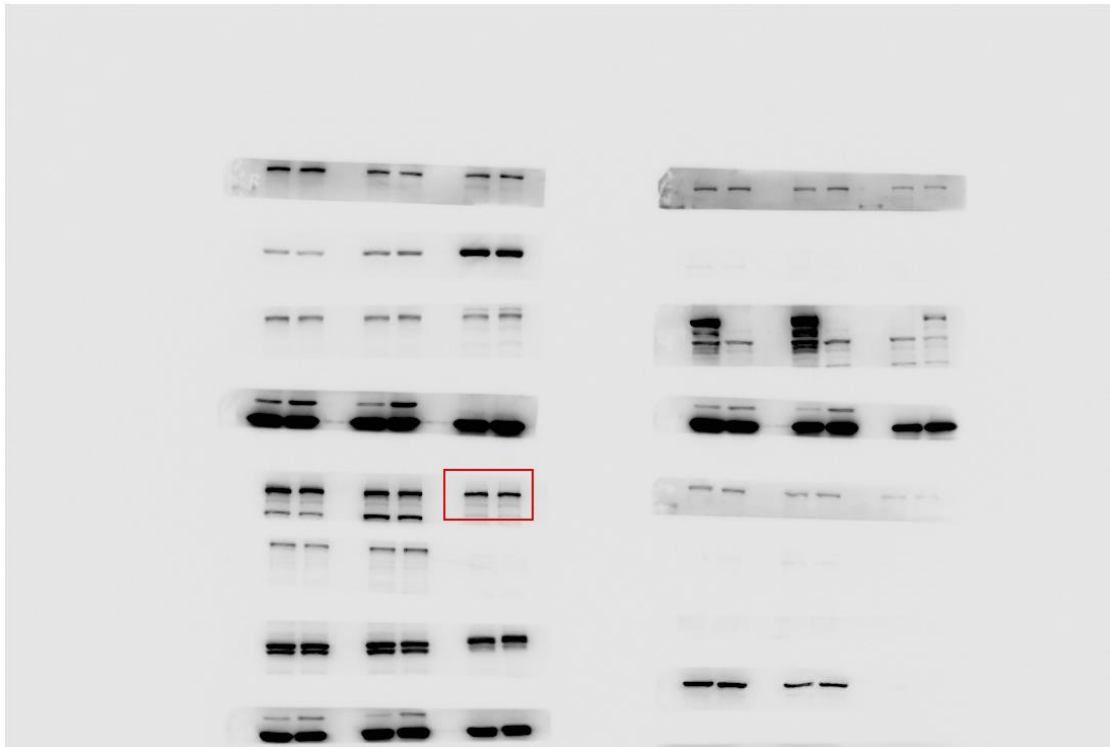

p-mTOR

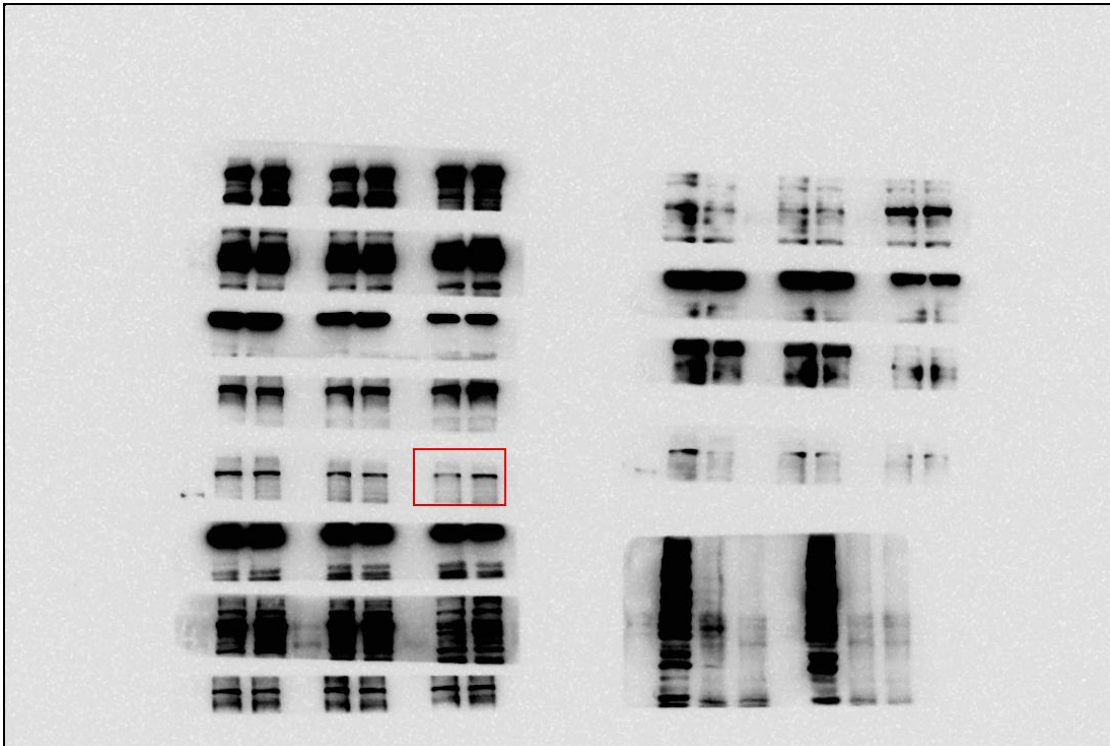

Actin

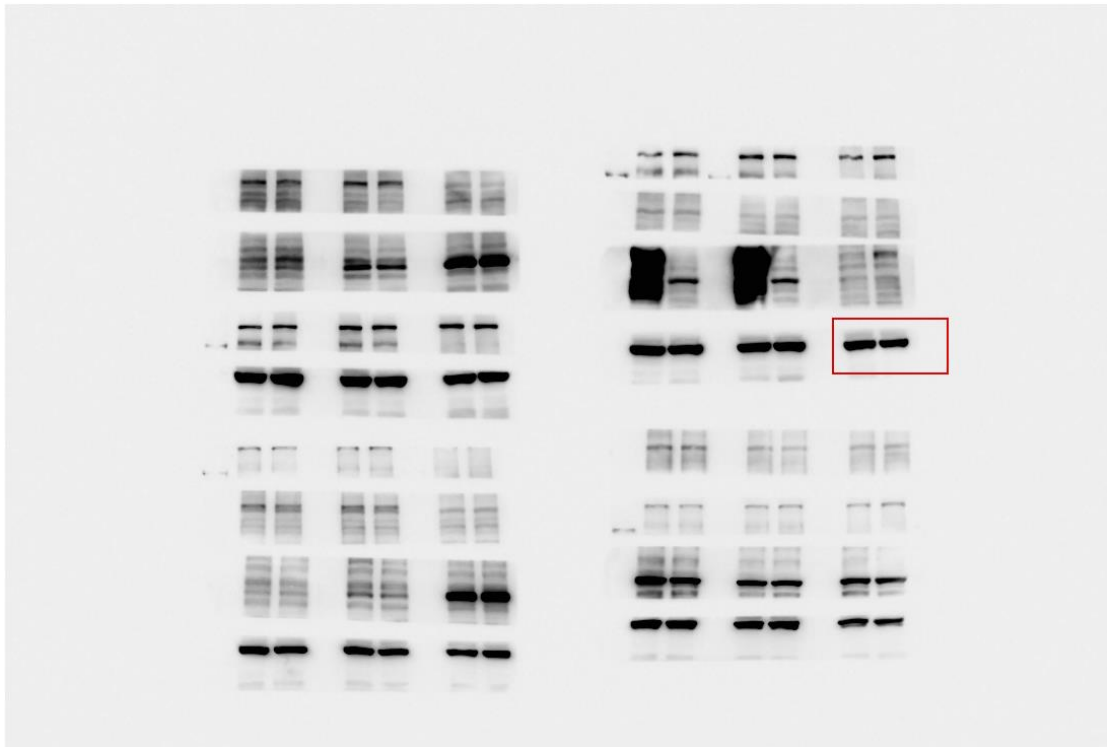

**Figure 5C**  
E-cadherin

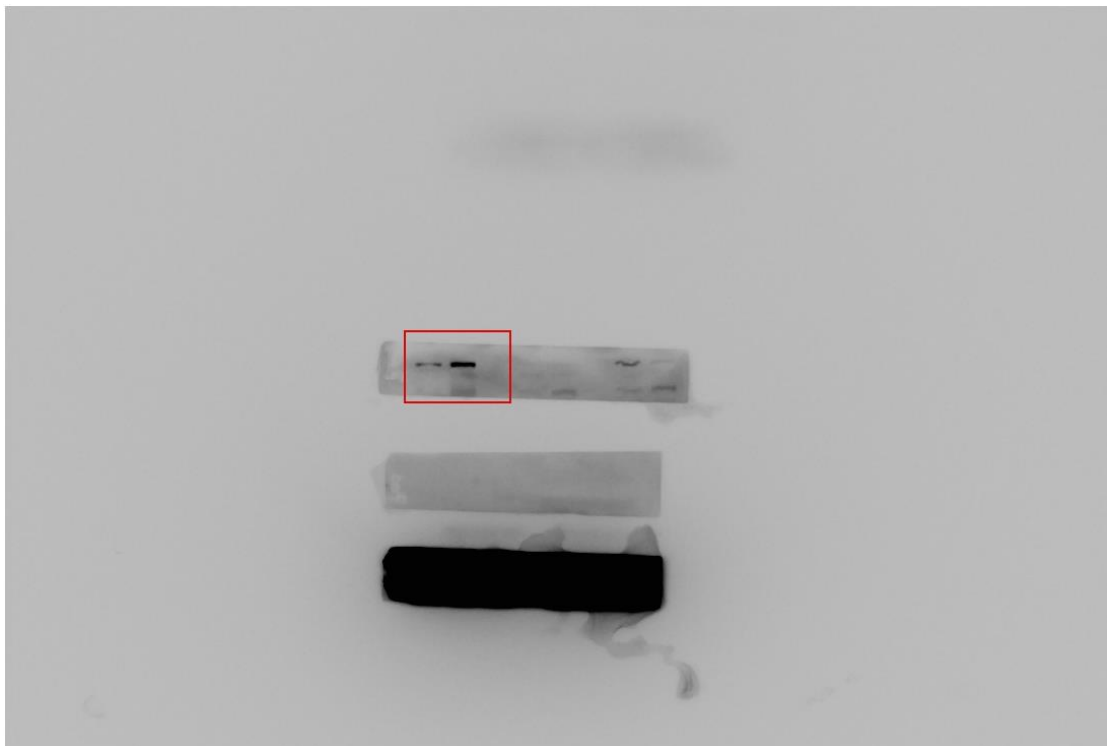

N-cadherin

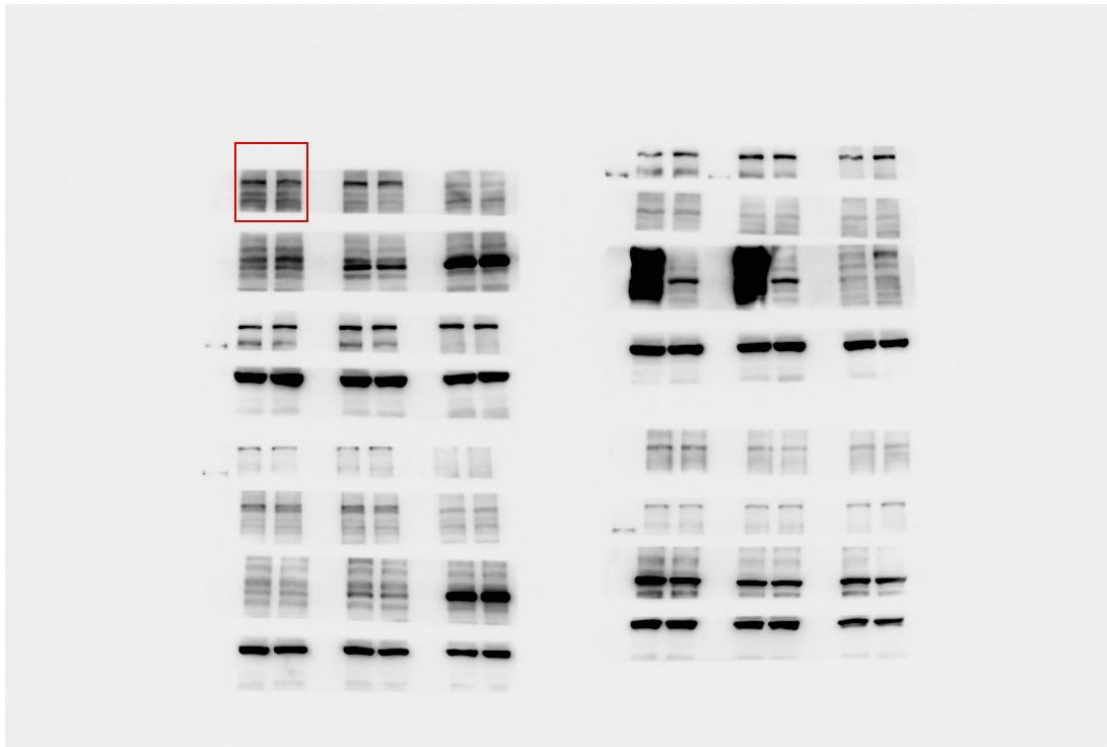

Vimentin

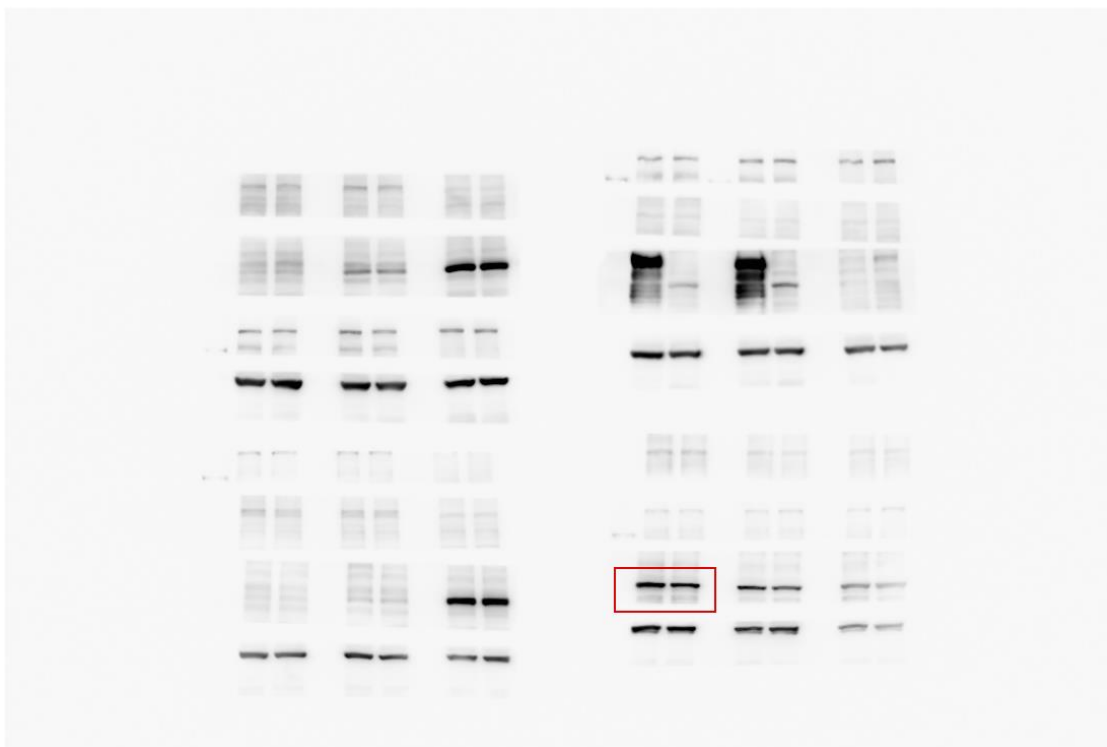

Actin

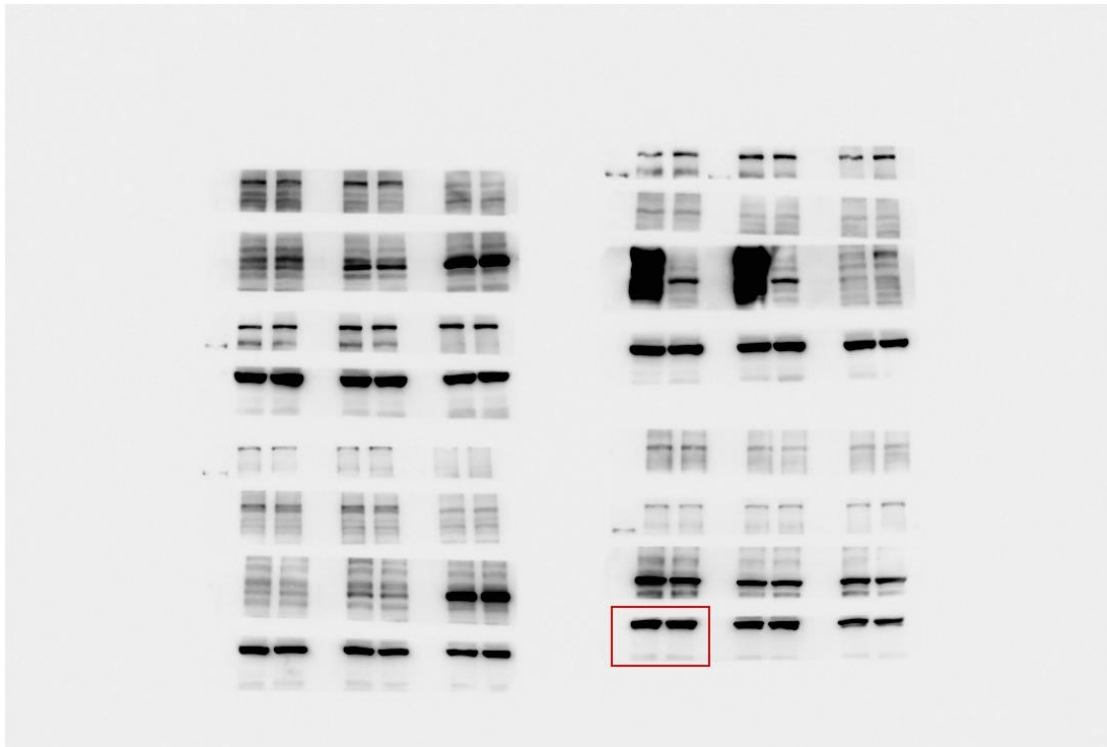

Figure 5D  
E-cadherin

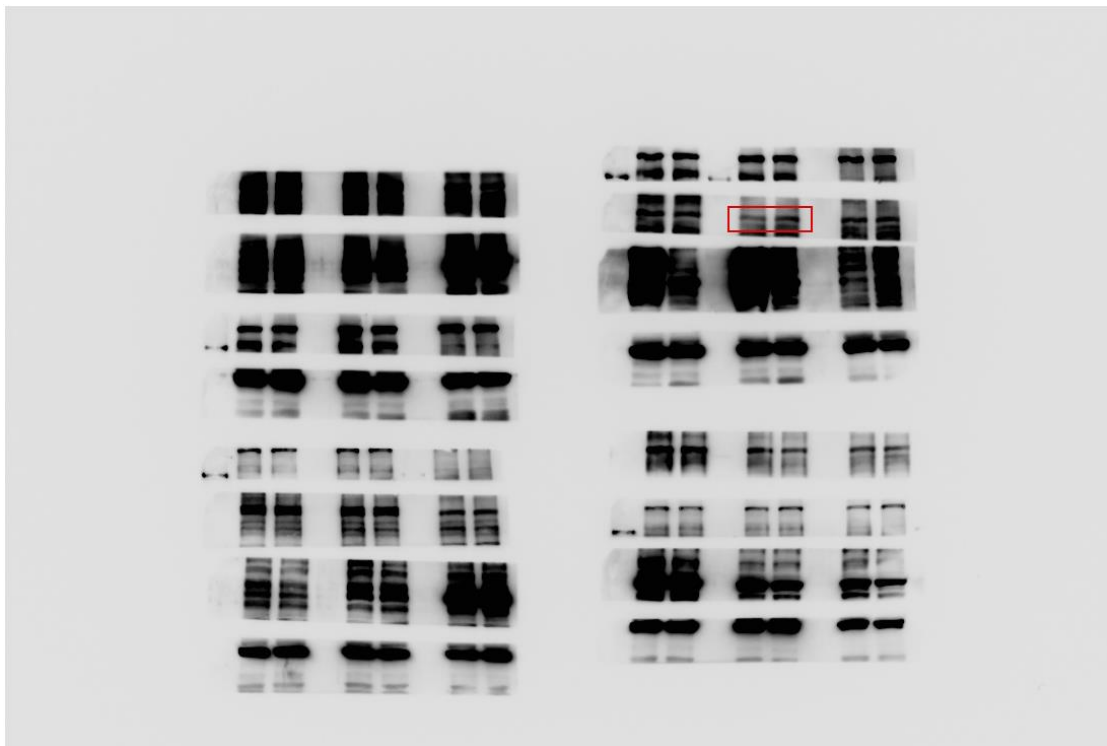



N-cadherin

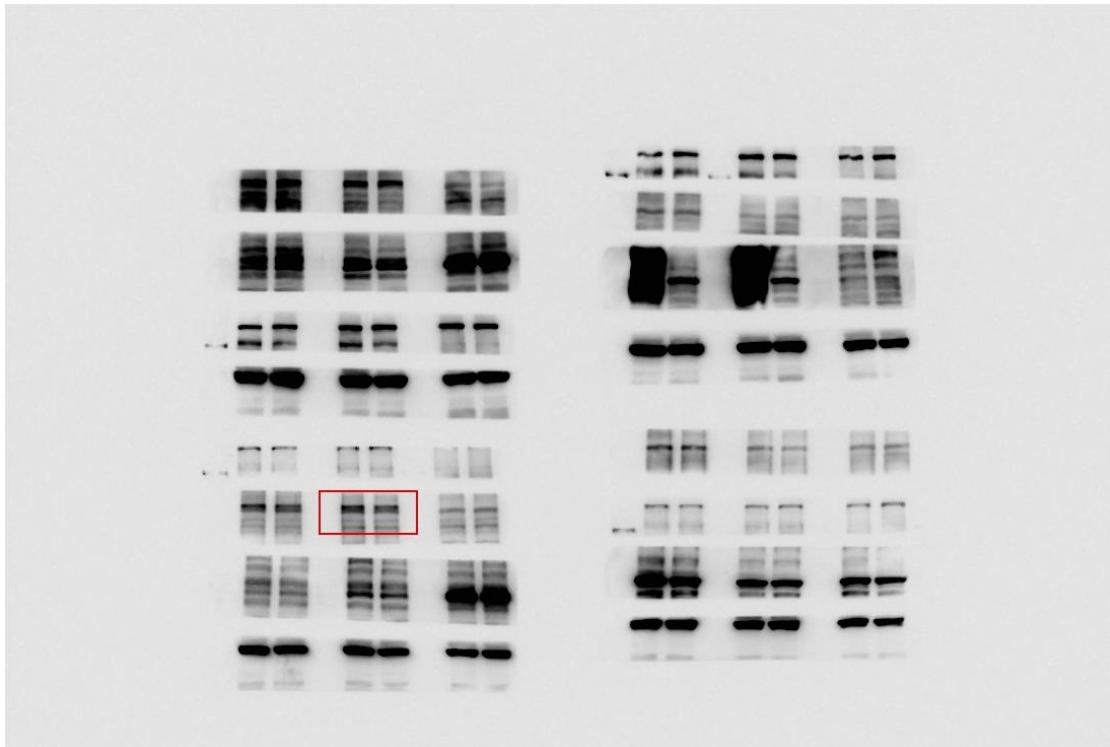

Vimentin

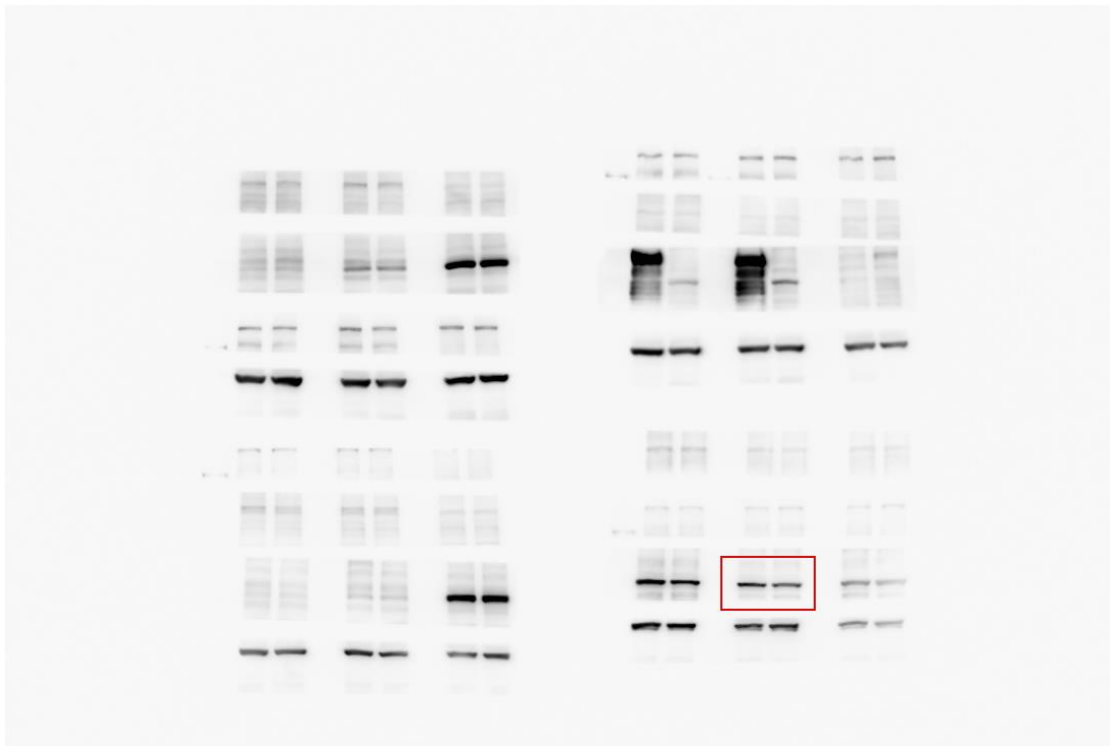

Actin

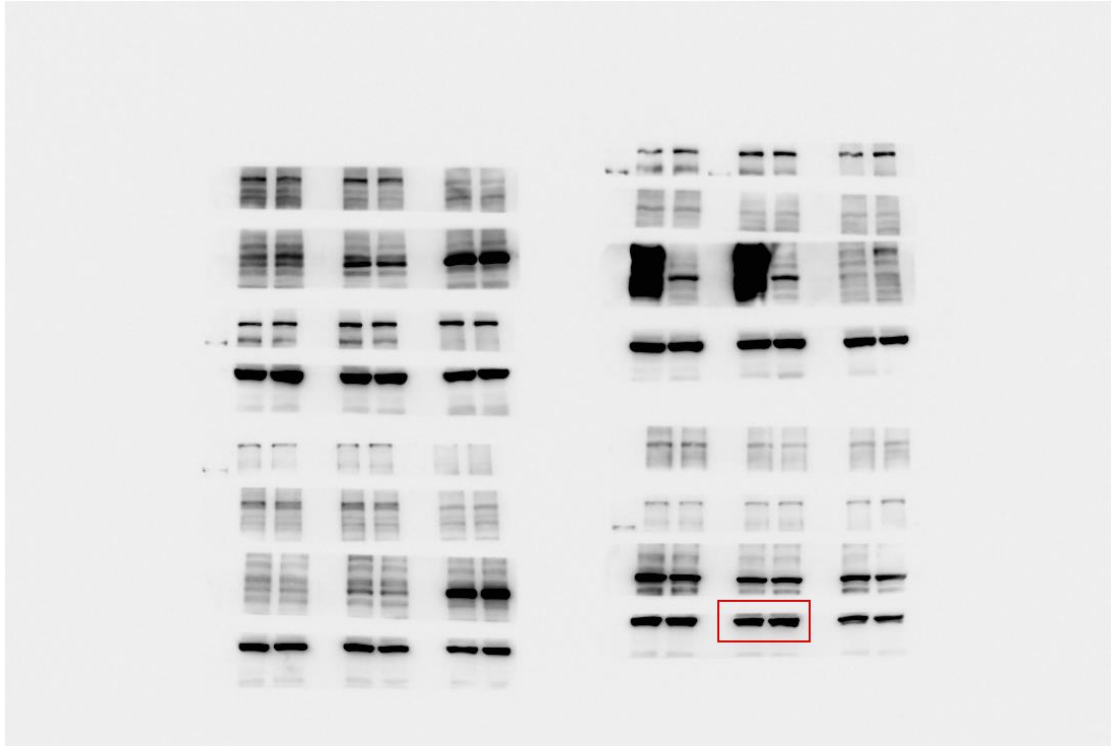

**Figure 5E**  
E-cadherin

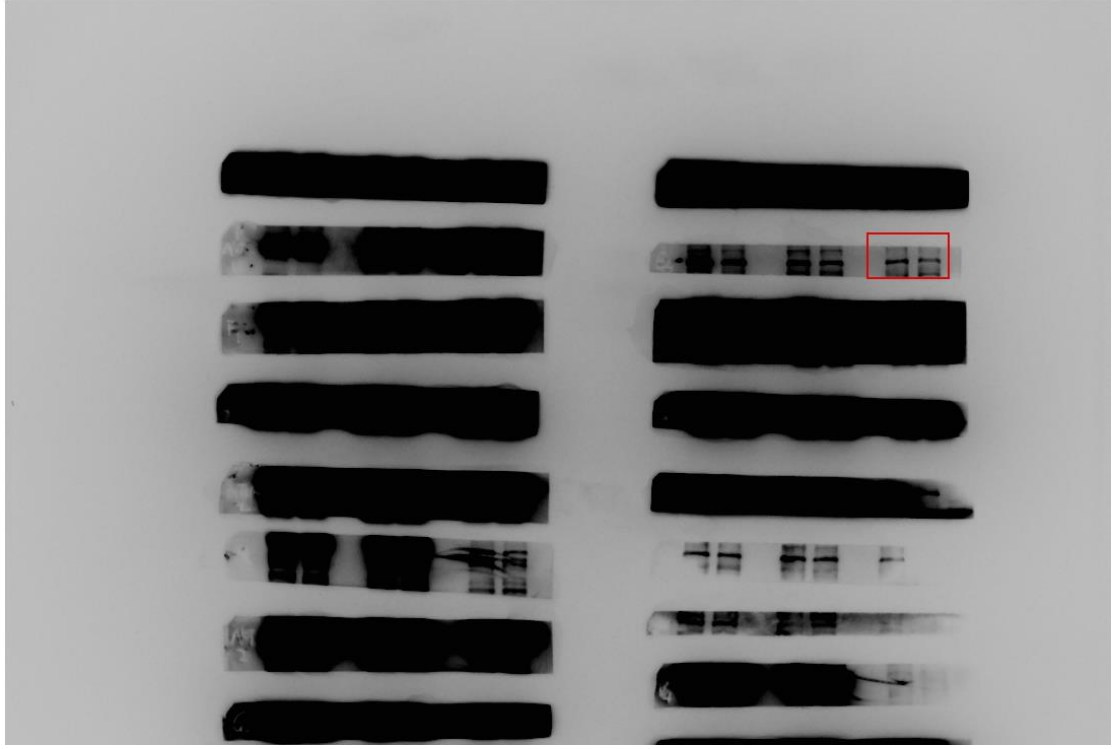

N-cadherin

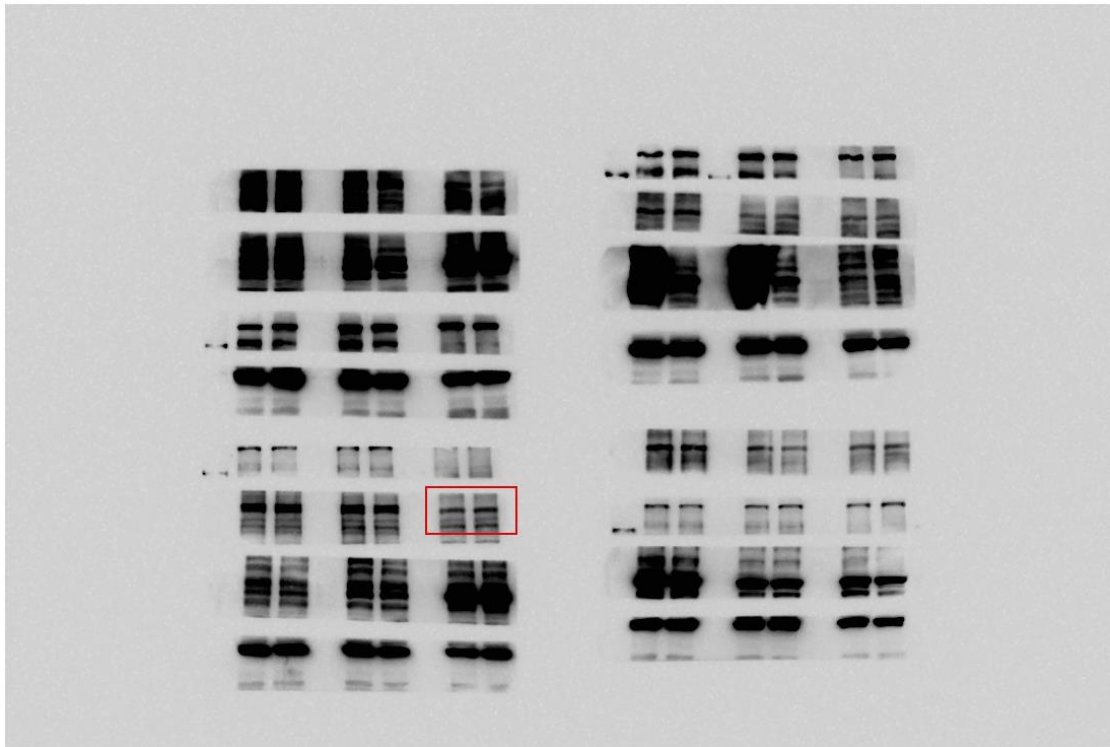

Vimentin

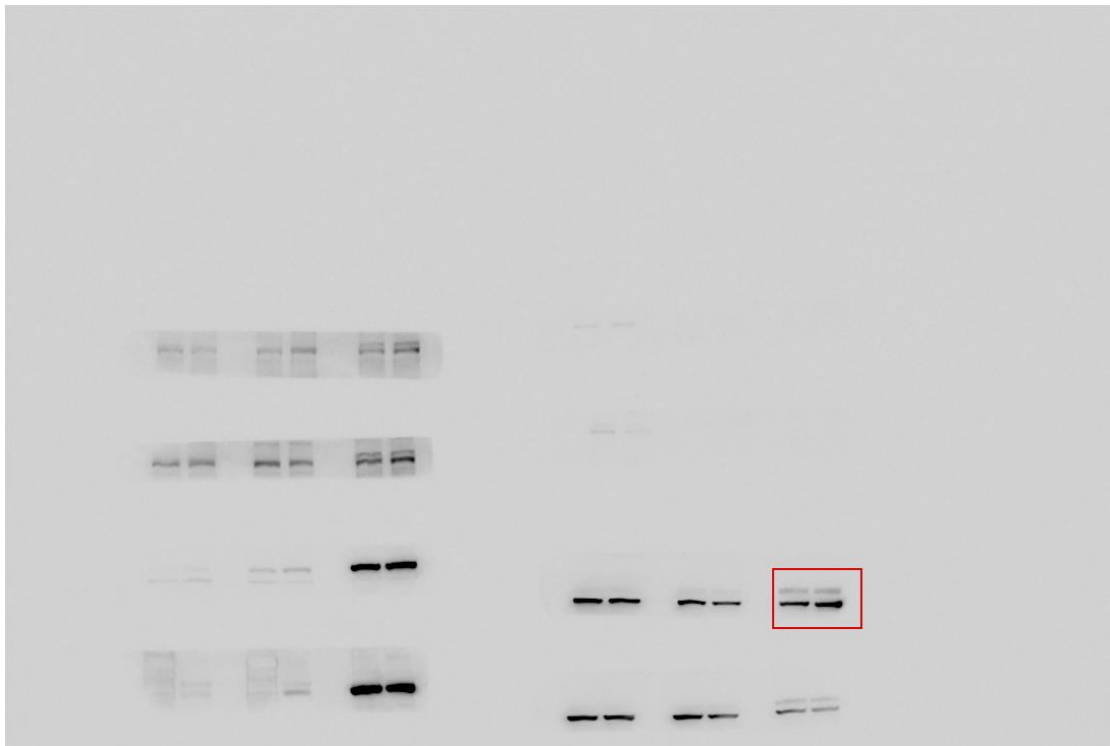

Actin

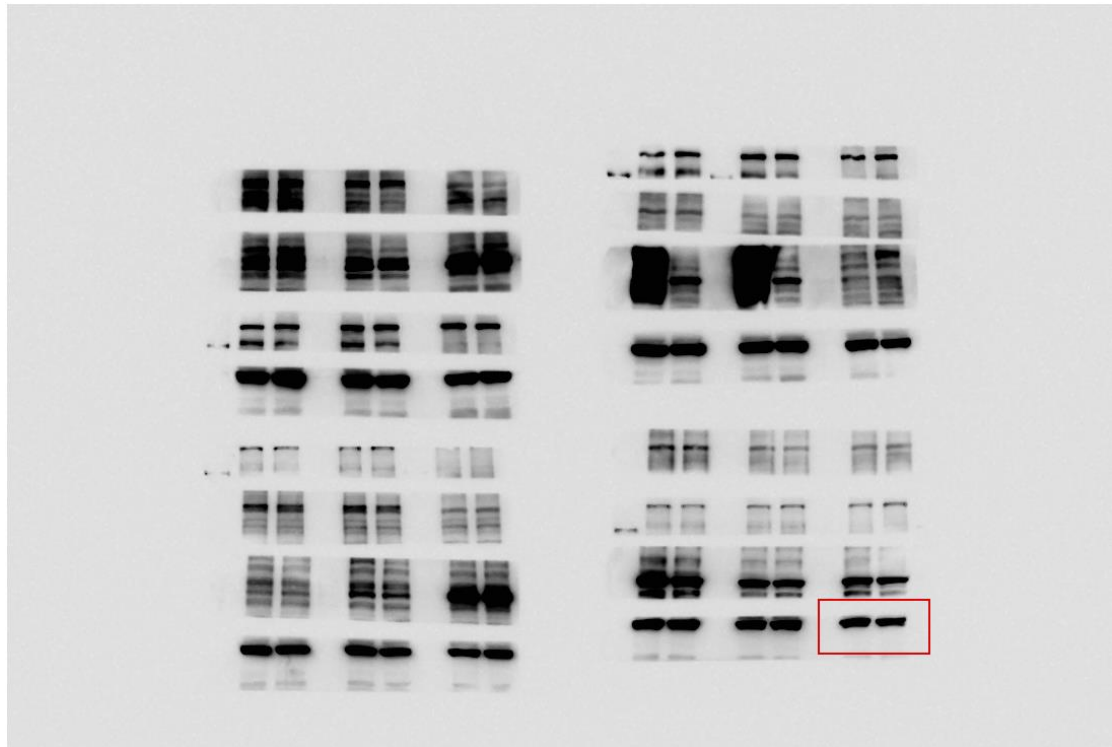

Figure 6A

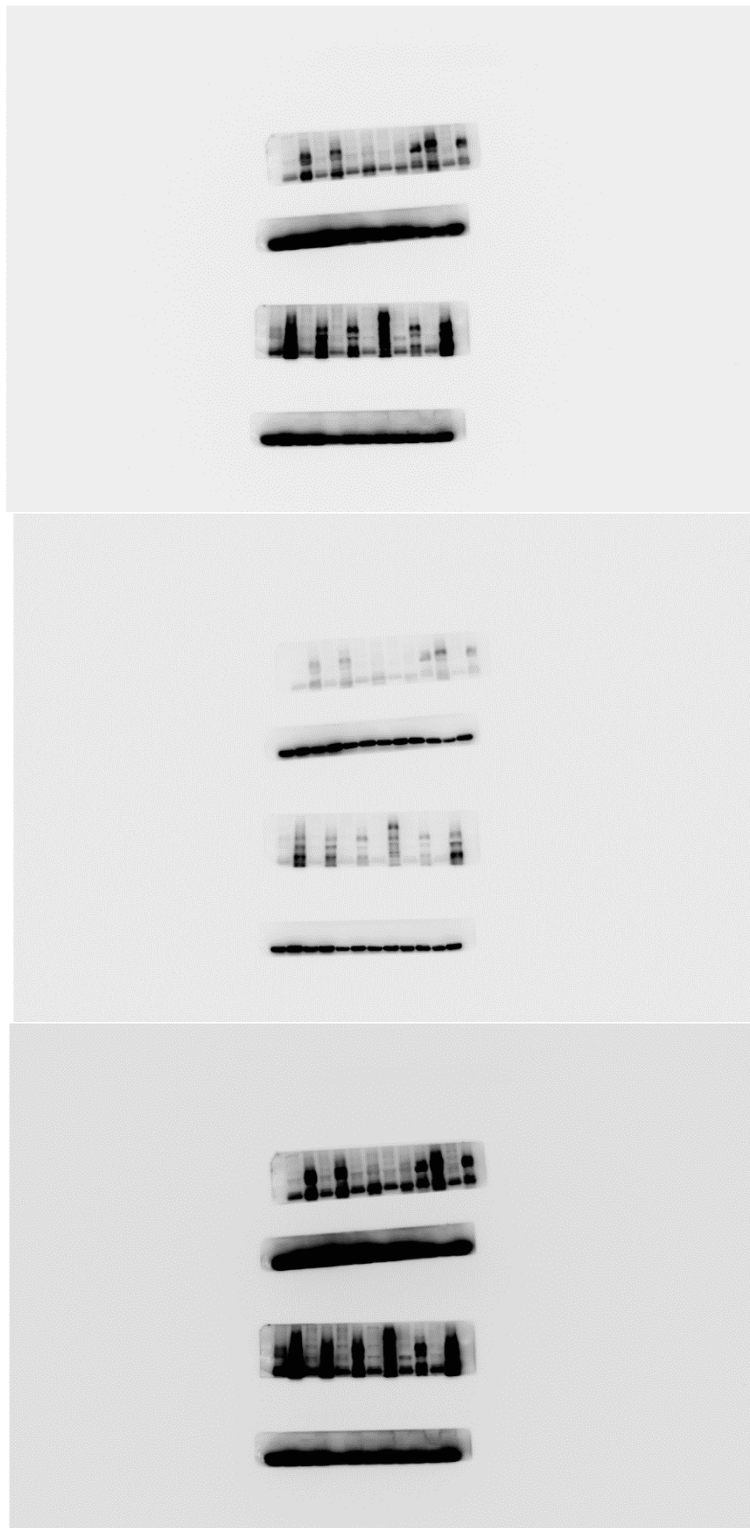

Supplement: 12885_2022_9541_MOESM1_ESM.pdf [file 12885_2022_9541_MOESM1_ESM.pdf]
